# Supplementary material for: Non-fused molecular photovoltaic acceptor with a planar core structure enabled by bulky and embracing-type side chains
Source: Royal Society of Chemistry journal article supplement (doi:10.1039/d1tc05550j), 2022-01-01
Supplement: d1tc05550j1.pdf [file d1tc05550j1.pdf]

**Electronic Supplementary Information**

**Non-fused molecular photovoltaic acceptor with a planar core  
structure enabled by bulky and embracing type side chains†**

Zhong-Xin Xue,<sup>a</sup> Jin Fang,<sup>\*,b</sup> Jia Li,<sup>c</sup> Di Zhang,<sup>a</sup> Zi-Wen Xu,<sup>a</sup> Li-Na Liu,<sup>a</sup> Jianhua Yao,<sup>\*,c,d</sup> Chang-  
Qi Ma<sup>b</sup> and Wei-Shi Li<sup>\*,a,d</sup>

- a. Key Laboratory of Synthetic and Self-assembly Chemistry for Organic Functional Molecules, Center for Excellence in Molecular Synthesis, Shanghai Institute of Organic Chemistry, University of Chinese Academy of Sciences, Chinese Academy of Sciences, 345 Lingling Road, Shanghai 200032, P. R. China. E-mail: liws@mail.sioc.ac.cn
- b. i-Lab & Printable Electronics Research Centre, Suzhou Institute of Nano-tech and nanobionics, Chinese Academy of Sciences, No. 398 Ruoshui Road, SEID, Suzhou Industrial Park, Suzhou, Jiangsu Province, 215123, PR China. E-mail: jfang2020@sinano.ac.cn
- c. CAS Key Laboratory of Energy Regulation Materials, Shanghai Institute of Organic Chemistry, Chinese Academy of Sciences, 345 Lingling Road, Shanghai 200032, China. E-mail: yaojh@mail.sioc.ac.cn
- d. Engineering Research Center of Zhengzhou for High Performance Organic Functional Materials, Zhengzhou Institute of Technology, 6 Yingcai Street, Huiji District, Zhengzhou, Henan 450044, P. R. China.

## 1. Materials and Instruments

Unless otherwise noted, all chemicals were purchased from Aldrich, Acros, TCI or Bide Pharmatech Ltd. and used without further purification. Unless otherwise noted, all reactions were performed under an atmosphere of nitrogen and monitored by thin layer chromatography (TLC) on silica plates. Column chromatography was carried out with 300-400 mesh silica gel.  $^1\text{H}$  and  $^{13}\text{C}$  NMR spectra were recorded on Bruker DRX 400, Bruker DRX 500, or Varian Mercury 300 (400 MHz) nuclear magnetic resonance (NMR) spectrometers. Mass spectra were measured on Agilent Technologies 5973N, Shimadzu Biotech Axima Performance, Thermo Fisher Scientific LTQ FT Ultra or Shimadzu Biotech Axima MALD mass spectrometers. Elemental analyses were performed on an Elementar Vario EL III analyzer. Ultraviolet-visible (UV-Vis) spectra were taken on a Hitachi U-3310 spectrophotometer. Cyclic voltammetry (CV) was done on a CHI610D electrochemical workstation with a Pt plate working electrode, a Pt wire counter electrode, and an  $\text{Ag}/\text{AgNO}_3$  reference electrode in a  $0.1 \text{ mol L}^{-1}$  tetrabutylammonium hexafluorophosphate ( $\text{Bu}_4\text{NPF}_6$ )  $\text{CH}_3\text{CN}$  solution. The experiments were calibrated with standard ferrocene/ferrocenium ( $\text{Fc}/\text{Fc}^+$ ) redox system having an energy level of 4.8 eV below vacuum. GIWAXS measurements were performed in a Xeuss SAXS/WAXS system (Xeuss 3.0) with a wavelength of  $\lambda = 1.3414 \text{ \AA}$ . Multimode atomic force microscopy (AFM) was performed using a Nanonavi E-Sweep instrument operating in the tapping mode. The thicknesses of the blend films were determined by a Veeco Dektak 150 surface profilometer.

## 2. Organic Solar Cells Fabrication and Characterization

Organic solar cells were fabricated with a device configuration of ITO/PEDOT:PSS/active layer /PFN-Br/Al. The conductivity of ITO is  $20 \text{ } \Omega$ . A mixture of **PM6** and acceptor molecule (**iPrBT-NFA** or **DeBT-NFA**) in chloroform was stirred at  $50 \text{ } ^\circ\text{C}$  three hours to ensure sufficient dissolution and then spin-coated onto PEDOT:PSS layer to form active layer. On one substrate, five cells with an effective area of  $0.04 \text{ cm}^2$  for each were fabricated. Current-voltage characteristics were recorded using Keithley 2420 (Enli Technology Ltd., Taiwan) under an AM 1.5G AAA class solar simulator with an intensity of  $100 \text{ mW cm}^{-2}$  as the white light source and

the intensity was calibrated with a standard single crystal Si photovoltaic cell. The temperature while measuring the J-V curves was approximately 25 °C. The EQE measurements of OSCs were performed by the solar cell spectral response measurement system 74125 (Enli Technology Ltd., Taiwan), which was calibrated by monocrystalline silicon solar cell in advance.

### 3. Material Synthesis

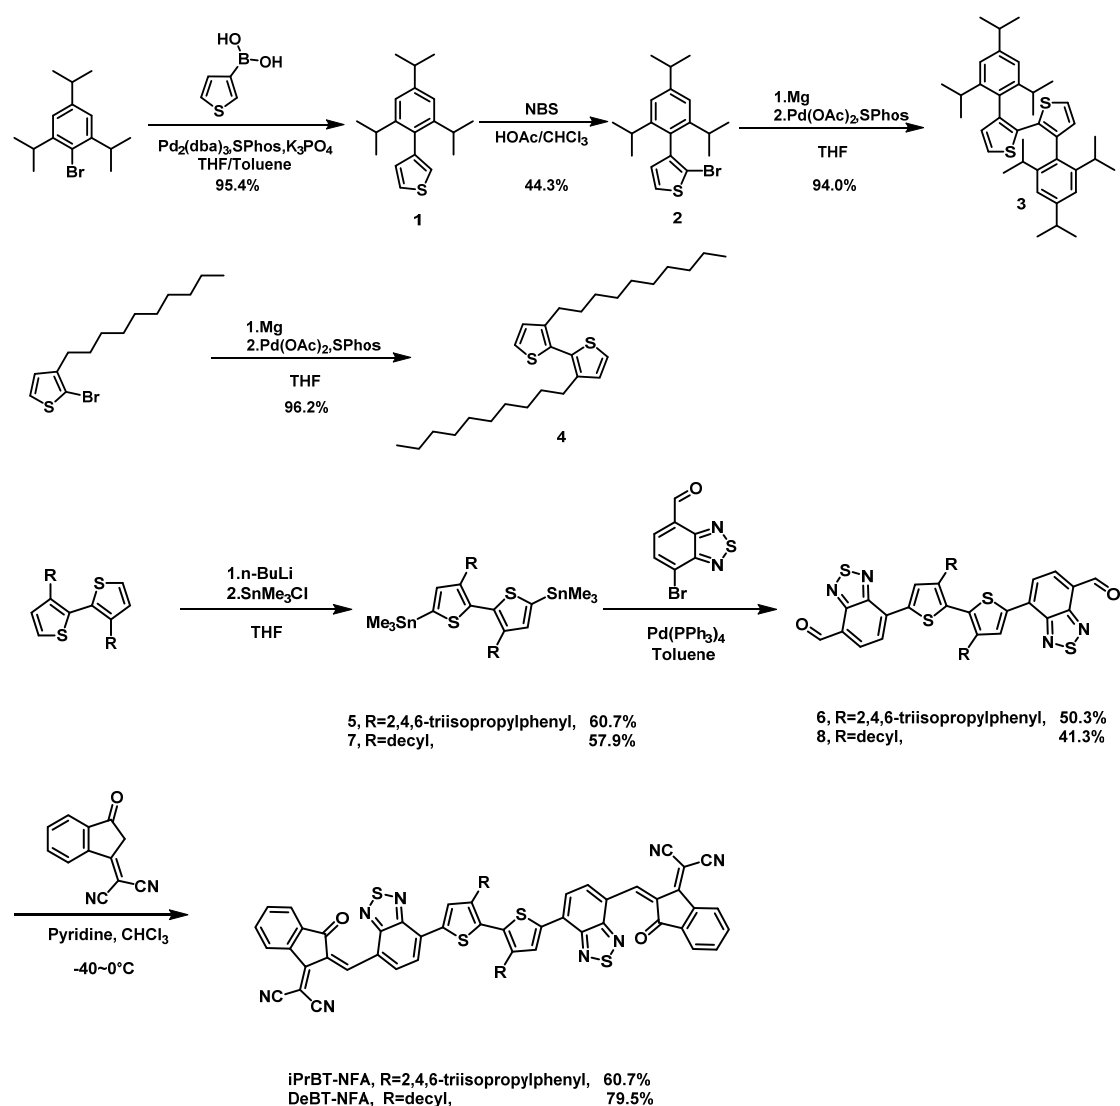

**Scheme S1.** Synthetic routes of **iPrBT-NFA** and **DeBT-NFA**.

**Compound 1:** 3-(2,4,6-triisopropylphenyl)thiophene

A mixture of 2-bromo-1,3,5-triisopropylbenzene (14.16 g, 50 mmol), thiophen-3-ylboronic acid (12.80 g, 100 mmol),  $K_3PO_4$  (21.23 g, 100 mmol), SPhos (821 mg, 2 mmol), anhydrous toluene (100 mL) and anhydrous THF (100 mL) was carefully degassed, then  $Pd_2(dba)_3$  (458 mg, 0.5 mmol) was added. The mixture was stirred and refluxed 16h, then extracted with DCM. The organic phase was dried over anhydrous  $Na_2SO_4$  and filtered. After the solvent had been removed from the filtrate, the residue was purified by chromatography using PE as eluent, yielding compound **1** as white solid (14.10 g, 95.4 %).  $^1H$  NMR (400 MHz,  $CDCl_3$ )  $\delta$ : 7.35 (dd,  $J_1=2.9$  Hz,  $J_2=4.8$  Hz, 1H), 7.04 (s, 2H), 7.01 (dd,  $J_1=1.2$  Hz,  $J_2=2.9$  Hz, 1H), 6.94 (dd,  $J_1=1.2$  Hz,  $J_2=4.8$  Hz, 1H), 2.92 (m,  $J=6.8$  Hz, 1H), 2.66 (m,  $J=6.8$  Hz, 2H), 1.29 (d,  $J=6.8$  Hz, 6H), 1.09 (d,  $J=6.8$  Hz, 6H), 1.08 (d,  $J=6.8$  Hz, 6H). MS (EI)  $m/z$ : 286 ( $M^+$ ).

**Compound 2:** 2-bromo-3-(2,4,6-triisopropylphenyl)thiophene

To a three-necked round-bottomed flask, compound **1** (13.28 g, 46.4 mmol) was dissolved in chloroform (30 mL) and acetic acid (30 mL). The solution was stirred at room temperature and NBS (8.66 g, 48.7 mmol) was added slowly to this solution. After the mixture became clear, it was neutralized with NaOH, then extracted with DCM. The organic phase was dried over anhydrous  $Na_2SO_4$  and filtered. After the solvent had been removed from the filtrate, the residue was purified by chromatography using PE as eluent, yielding compound **2** as white solid (7.51 g, 44.3 %).  $^1H$  NMR (400 MHz,  $CDCl_3$ )  $\delta$ : 7.30 (d,  $J=5.4$  Hz, 1H), 7.04 (s, 2H), 6.78 (d,  $J=5.4$  Hz, 1H), 2.93 (m,  $J=6.9$  Hz, 1H), 2.56 (m,  $J=6.9$  Hz, 2H), 1.29 (d,  $J=6.9$  Hz, 6H), 1.16 (d,  $J=6.9$  Hz, 6H), 1.05 (d,  $J=6.9$  Hz, 6H). MS (EI)  $m/z$ : 364 ( $M^+$ ).

**Compound 3:** 3,3'-bis(2,4,6-triisopropylphenyl)-2,2'-bithiophene

To a mixture of magnesium turning (237 mg, 9.75 mmol), 4 mL anhydrous THF and a grain of iodine, a solution of compound **2** (3.56 g, 9.75 mmol) in 8 mL anhydrous THF was slowly added. The mixture was stirred and refluxed under nitrogen till the magnesium was exhausted. The prepared grignard reagent was added to a mixture of compound **2** (2.37 g, 6.5 mmol),  $Pd(OAc)_2$  (22.5 mg, 0.10 mmol), SPhos (160.1 mg, 0.39 mmol) and 16 mL anhydrous THF. The mixture was stirred and refluxed overnight. Water (20 mL) was added and the mixture was

extracted with DCM. The organic phase was dried over anhydrous Na<sub>2</sub>SO<sub>4</sub> and filtered. After the solvent had been removed from the filtrate, the residue was purified by chromatography using PE as eluent, yielding compound **3** as white solid (3.49 g, 94.0 %). <sup>1</sup>H NMR (400 MHz, CDCl<sub>3</sub>) δ: 7.08 (s, 2H), 6.98 (d, *J*=5.0 Hz, 1H), 6.67 (d, *J*=5.0 Hz, 1H), 2.98 (m, *J*=6.9 Hz, 1H), 2.62 (m, *J*=6.9 Hz, 2H), 1.33 (d, *J*=6.9 Hz, 6H), 1.06 (d, *J*=6.9 Hz, 6H), 1.02 (d, *J*=6.9 Hz, 6H). MS (EI) *m/z*: 571.3(M<sup>+</sup>).

**Compound 5:** (3,3'-bis(2,4,6-triisopropylphenyl)-[2,2'-bithiophene]-5,5'-diyl)bis(trimethylstannane)

To a three-necked round-bottomed flask, compound **3** (3.40 g, 5.96 mmol) was dissolved in anhydrous THF (80 mL). A solution of n-butyllithium (2.5 M in hexane, 8.4 mL, 20.9 mmol) was added dropwise at room temperature. After 1h of stirring, a solution of SnMe<sub>3</sub>Cl (1 M, 14.4 mL, 14.4 mmol) was added to this solution. Water (50 mL) was added after stirring overnight, and the mixture was extracted with DCM. The organic phase was dried over anhydrous Na<sub>2</sub>SO<sub>4</sub> and filtered. After the solvent had been removed from the filtrate, the residue was recrystallized from ethanol, yielding compound **5** as yellow solid (3.24 g, 60.7 %). <sup>1</sup>H NMR (400 MHz, CDCl<sub>3</sub>) δ: 7.06 (s, 2H), 2.96 (m, *J*=7.0 Hz, 1H), 2.56 (m, *J*=7.0 Hz, 2H), 1.32 (d, *J*=7.0 Hz, 6H), 1.01 (d, *J*=7.0 Hz, 6H), 1.00 (d, *J*=7.0 Hz, 6H), 1.84 (s, 6H), 0.17 (s, 9H). MS (EI) *m/z*: 897.3(M<sup>+</sup>).

**Compound 6:** 7,7'-(3,3'-bis(2,4,6-triisopropylphenyl)-[2,2'-bithiophene]-5,5'-diyl)bis(benzo[c][1,2,5]thiadiazole-4-carbaldehyde)

A mixture of compound **5** (1.62 g, 1.81 mmol), 7-bromobenzo[c][1,2,5]thiadiazole -4-carbaldehyde (1.10 g, 4.53 mmol) and anhydrous toluene (20 mL) was carefully degassed, then Pd(PPh<sub>3</sub>)<sub>4</sub> (41.8 mg, 0.04 mmol) was added. The mixture was stirred and refluxed 16h, then extracted with DCM. The organic phase was dried over anhydrous Na<sub>2</sub>SO<sub>4</sub> and filtered. After the solvent had been removed from the filtrate, the residue was purified by chromatography using DCM as eluent, yielding compound **6** as dark red solid (859 mg, 53.0 %). <sup>1</sup>H NMR (400 MHz, CDCl<sub>3</sub>) δ: 10.67 (s, 1H), 8.24 (s, 1H), 8.11 (d, *J*=7.5 Hz, 1H), 7.61 (d, *J*=7.5 Hz, 1H), 7.25(s,2H), 3.10 (m, *J*=6.9 Hz, 1H), 2.77 (m, *J*=6.9 Hz, 2H), 1.44 (d, *J*=6.9 Hz, 6H), 1.17 (d, *J*=6.9 Hz, 6H),

1.15 (d,  $J=6.9$  Hz, 6H). MS (EI)  $m/z$ : 895.3 ( $M+H^+$ ).

#### Compound iPrBT-NFA:

To a flask were added compound 6 (357.7 mg, 0.40 mmol), chloroform (40 mL) and pyridine (2.4 mL). 2-(3-oxo-2,3-dihydro-1H-inden-1-ylidene)malononitrile (310.7 mg, 1.60 mmol) was slowly added to the mixture at  $-40\text{ }^{\circ}\text{C}$ . After 10 min, the mixture was allowed to warm to  $-15\text{ }^{\circ}\text{C}$  and stirred 4h. The mixture was poured into methanol (150 mL) and filtered. The residue was successively washed by methanol, hexane and acetone, then purified by column chromatography using chloroform as eluent, yielding **iPrBT-NFA** as dark blue solid (302.5 mg, 60.7 %).  $^1\text{H}$  NMR (400 MHz,  $\text{CDCl}_3$ )  $\delta$ : 9.51 (s, 1H), 9.09-9.07 (m, 1H), 8.73 (d,  $J=8.2$  Hz, 1H), 8.21 (s, 1H), 7.96-7.94 (m, 1H), 7.86-7.77 (m, 2H), 7.67 (d,  $J=8.2$  Hz, 1H), 7.26 (s, 2H), 3.11 (m,  $J=6.9$  Hz, 1H), 2.77 (m,  $J=6.9$  Hz, 2H), 1.44 (d,  $J=6.9$  Hz, 6H), 1.18 (d,  $J=6.9$  Hz, 6H), 1.14 (d,  $J=6.9$  Hz, 6H).  $^{13}\text{C}$  NMR (101 MHz,  $\text{CDCl}_3$ )  $\delta$  187.34, 161.58, 155.92, 151.38, 150.65, 147.95, 140.90, 140.37, 139.96, 137.91, 137.46, 137.15, 136.28, 135.86, 135.05, 134.05, 132.37, 130.65, 130.58, 125.47, 124.48, 123.96, 123.30, 121.94, 114.27, 113.83, 35.69, 31.76, 26.21, 24.57, 23.95. HRMS (MALDI)  $m/z$ : 1246.4 ( $M^+$ ). Element anal. calcd. for  $\text{C}_{76}\text{H}_{62}\text{N}_8\text{O}_2\text{S}_4$ : C 73.2%, H 5.10%, N 8.98%, found C 72.6%, H 5.26%, N 8.77%.

#### Compound 4: 3,3'-didecyl-2,2'-bithiophene

To a mixture of magnesium turning (219 mg, 9 mmol), 4 mL anhydrous THF and a grain of iodine, a solution of 2-bromo-3-decylthiophene (2.73 g, 9 mmol) in 8 mL anhydrous THF was slowly added. The mixture was stirred and refluxed under nitrogen till the magnesium was exhausted. The prepared grignard reagent was added to a mixture of 2-bromo-3-decylthiophene (1.82 g, 6 mmol),  $\text{Pd}(\text{OAc})_2$  (20.2 mg, 0.09 mmol), SPhos (147.8 g, 0.36 mmol) and 15 mL anhydrous THF. The mixture was stirred and refluxed overnight. Water (20 mL) was added and the mixture was extracted with DCM. The organic phase was dried over anhydrous  $\text{Na}_2\text{SO}_4$  and filtered. After the solvent had been removed from the filtrate, the residue was purified by chromatography using PE as eluent, yielding compound **4** as yellow oil (2.58 g, 96.2 %).  $^1\text{H}$  NMR (400 MHz, Chloroform- $d$ )  $\delta$  7.27 (d,  $J=5.2$  Hz, 1H), 6.95 (d,  $J=5.2$  Hz, 1H), 2.48 (t,  $J=7.9$  Hz,

2H), 1.22 (s, 16H), 0.87 (t,  $J = 7.0$  Hz, 3H).

**Compound 7:** (3,3'-didecyl-[2,2'-bithiophene]-5,5'-diyl)bis(trimethylstannane)

To a three-necked round-bottomed flask, compound **4** (3.23g, 7.22 mmol) was dissolved in anhydrous THF (100 mL). A solution of n-butyllithium (2.5 M in hexane, 10.1 mL, 25.3 mmol) was added dropwise at room temperature. After 1h of stirring, a solution of  $\text{SnMe}_3\text{Cl}$  (1 M, 17.4 mL, 17.4 mmol) was added to this solution. Water (50 mL) was added after stirring overnight, and the mixture was extracted with DCM. The organic phase was dried over anhydrous  $\text{Na}_2\text{SO}_4$  and filtered. After the solvent had been removed from the filtrate, the residue was recrystallized from ethanol, yielding compound **7** as yellow solid (4.01 g, 79.6 %).  $^1\text{H}$  NMR (400 MHz, Chloroform- $d$ )  $\delta$  7.01 (s, 1H), 2.49 (t,  $J = 7.9$  Hz, 2H), 1.30-1.17 (m, 16H), 0.86 (t,  $J = 6.8$  Hz, 3H), 0.35 (s, 9H). MS (EI)  $m/z$ : 772.2( $\text{M}^+$ ).

**Compound 8:** 7,7'-(3,3'-didecyl-[2,2'-bithiophene]-5,5'-diyl)bis(benzo[*c*][1,2,5]thiadiazole-4-carbaldehyde)

A mixture of compound **7** (1.40 g, 1.81 mmol), 7-bromobenzo[*c*][1,2,5]thiadiazole-4-carbaldehyde (1.10 g, 4.53 mmol) and anhydrous toluene (20 mL) was carefully degassed, then  $\text{Pd}(\text{PPh}_3)_4$  (41.8 mg, 0.04 mmol) was added. The mixture was stirred and refluxed 16h, then extracted with DCM. The organic phase was dried over anhydrous  $\text{Na}_2\text{SO}_4$  and filtered. After the solvent had been removed from the filtrate, the residue was purified by chromatography using DCM as eluent, yielding compound **8** as dark red solid (576 mg, 41.2 %).  $^1\text{H}$  NMR (400 MHz,  $\text{CDCl}_3$ )  $\delta$  10.73 (s, 1H), 8.24 (d,  $J = 7.5$  Hz, 1H), 8.24 (s, 1H), 8.01 (d,  $J = 7.5$  Hz, 1H), 2.70 (t,  $J = 7.9$  Hz, 2H), 1.33-1.18 (m, 16H), 0.81 (d,  $J = 7.1$  Hz, 3H). MS (EI)  $m/z$ : 771.2( $\text{M}^+$ ).

**Compound DeBT-NFA:**

To a flask were added compound **8** (385.2 mg, 0.50 mmol), chloroform (40 mL) and pyridine (2.4 mL). 2-(3-oxo-2,3-dihydro-1H-inden-1-ylidene)malononitrile (388.1 mg, 2.0 mmol) was slowly added to the mixture at  $-40$  °C. 10 min later the mixture was allowed to warm to  $-15$  °C and stirred 4 h. The mixture was poured into methanol (150 mL) and filtered. The residue was

successively washed by methanol, hexane and acetone, then purified by column chromatography using chloroform as eluent, yielding **DeBT-NFA** as dark blue solid (305 mg, 51.2 %).  $^1\text{H}$  NMR (400 MHz,  $\text{CDCl}_3$ )  $\delta$  9.58 (s, 1H), 9.23 (d,  $J = 7.7$  Hz, 1H), 8.75 (d,  $J = 7.3$  Hz, 1H), 8.32 (s, 1H), 8.06 (d,  $J = 7.8$  Hz, 1H), 7.97 (d,  $J = 6.9$  Hz, 1H), 7.85 (m, 2H), 2.73 (t,  $J = 7.9$  Hz, 3H), 1.33-1.17 (m, 16H), 0.83 (d,  $J = 7.2$  Hz, 3H).  $^{13}\text{C}$  NMR (101 MHz,  $\text{CDCl}_3$ )  $\delta$  186.47, 161.41, 155.94, 151.62, 144.74, 140.10, 139.09, 137.68, 136.19, 135.88, 135.10, 133.77, 132.60, 132.21, 131.27, 125.39, 124.61, 123.82, 120.54, 114.26, 113.87, 31.92, 30.67, 29.68, 29.56, 29.51, 29.49, 29.34, 22.68, 22.61, 14.07. HRMS (MALDI)  $m/z$ : 1122.3 ( $\text{M}^+$ ). Element anal. calcd. for  $\text{C}_{66}\text{H}_{58}\text{N}_8\text{O}_2\text{S}_4$ : C 70.2%, H 5.20%, N 9.97%, found C 69.9%, H 5.39%, N 9.77%.



## 4. Supporting Figures and Tables

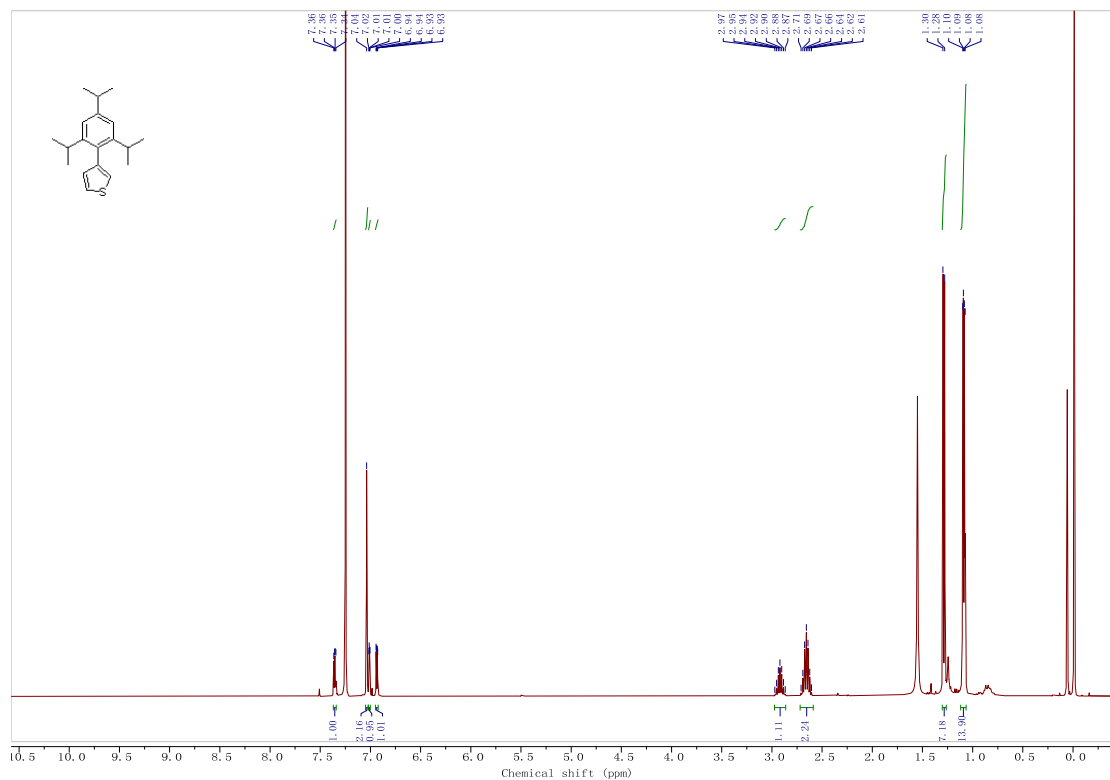

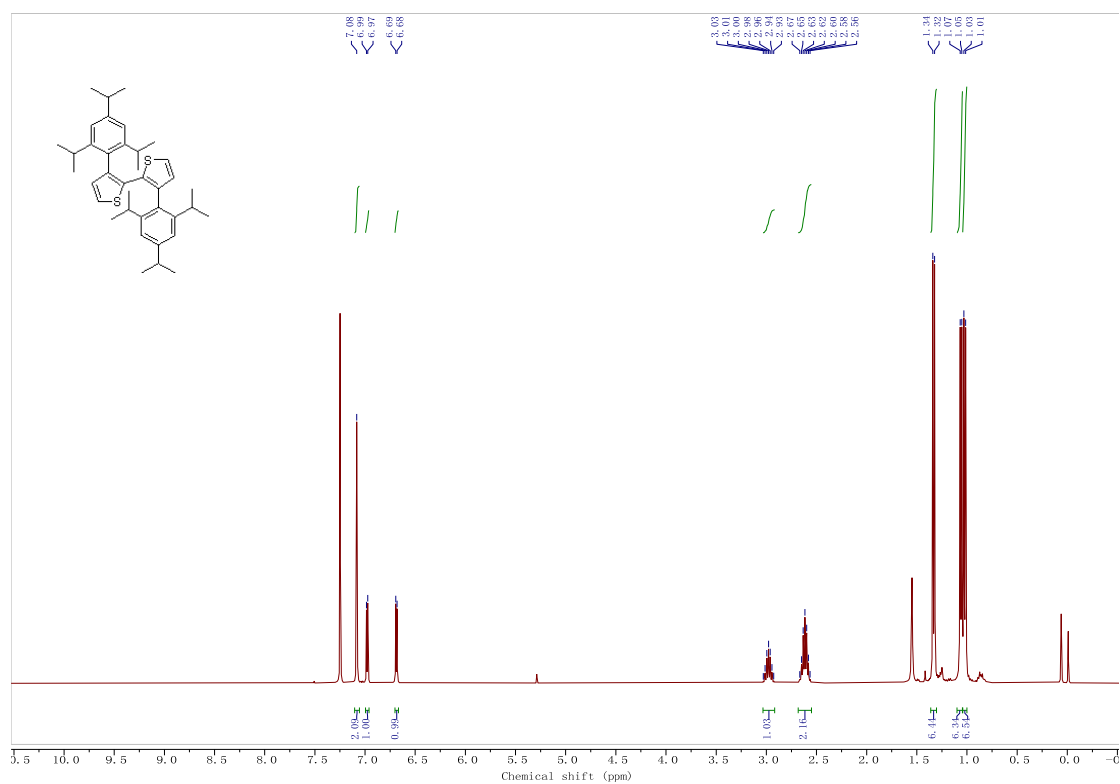

**Fig.S3**  $^1\text{H}$  NMR of compound **3** in CDCl<sub>3</sub>.

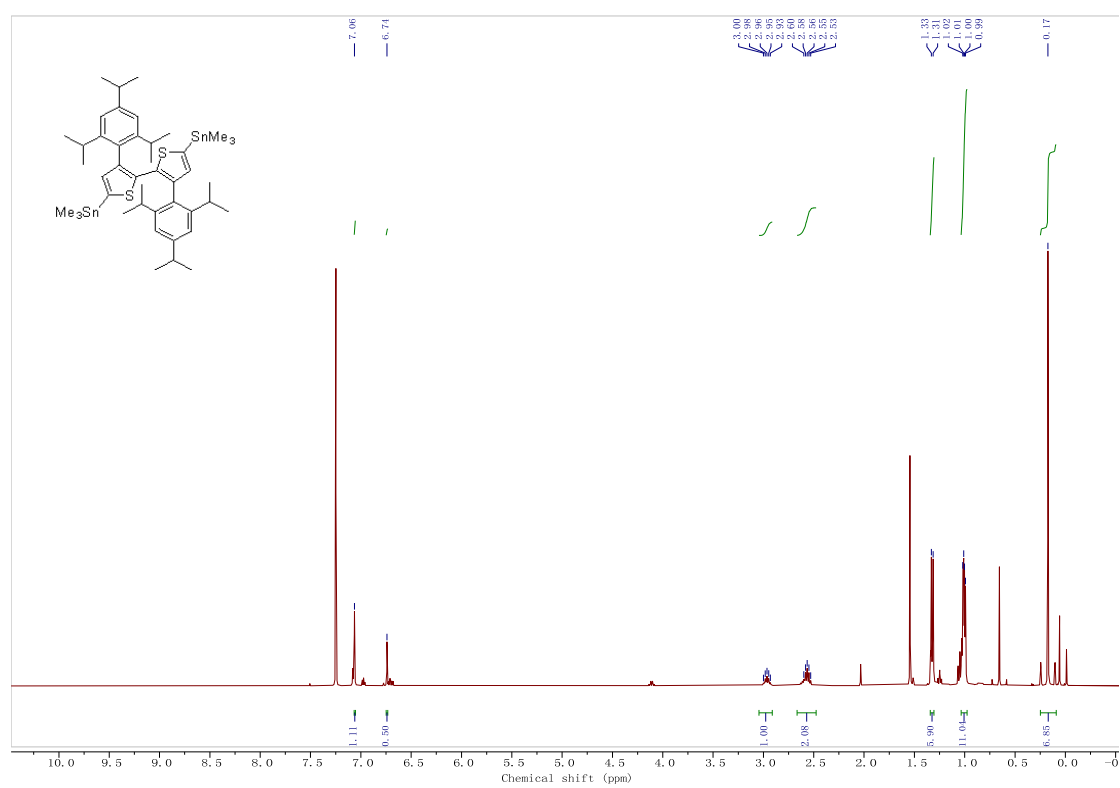

**Fig.S4**  $^1\text{H}$  NMR of compound **5** in CDCl<sub>3</sub>.

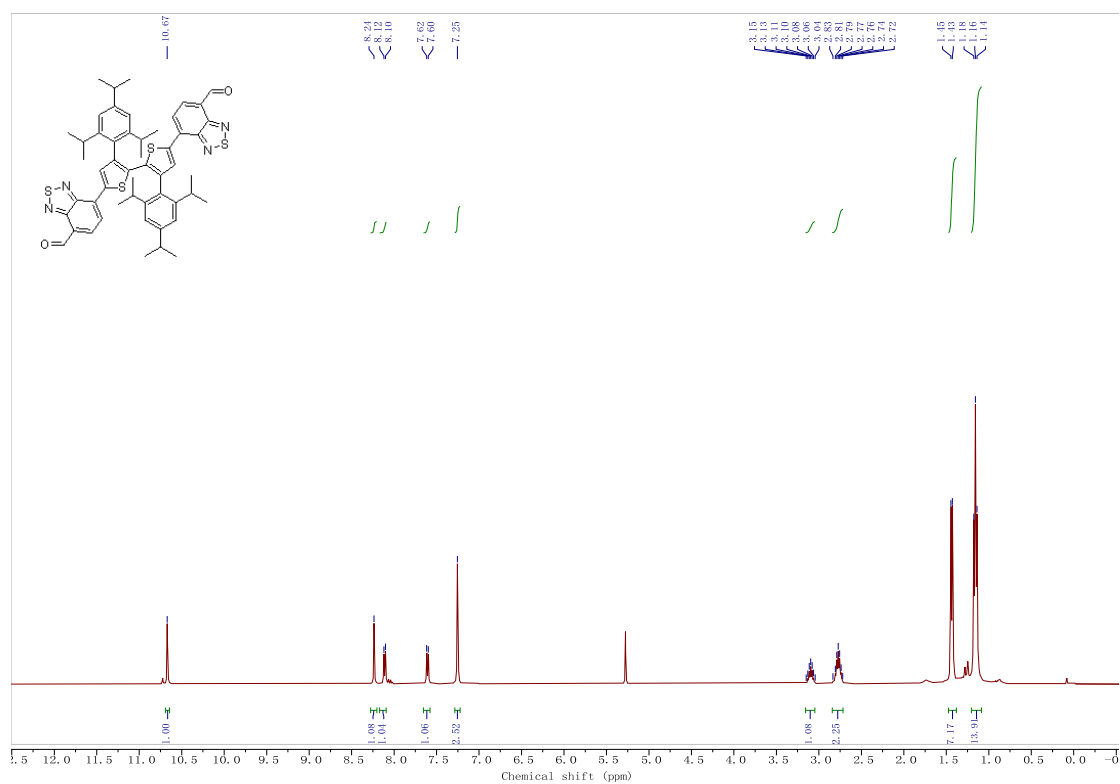

**Fig.S5**  $^1\text{H}$  NMR of compound **6** in  $\text{CDCl}_3$ .

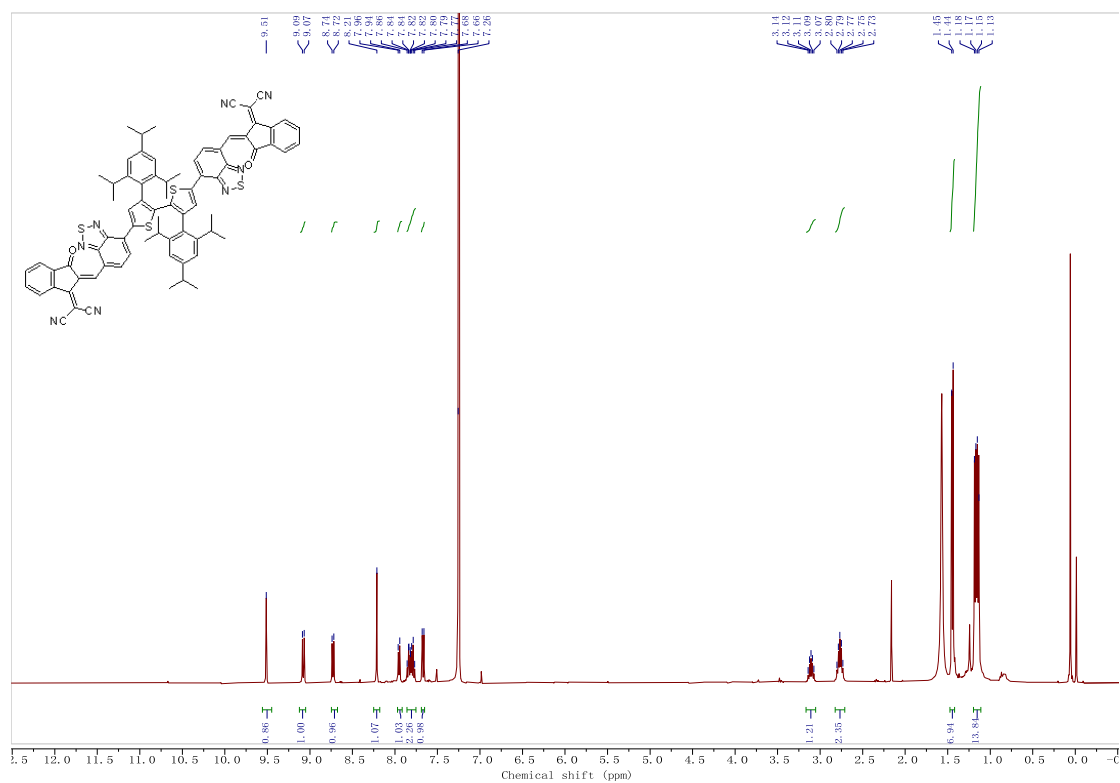

**Fig.S6**  $^1\text{H}$  NMR of compound **iPrBT-NFA** in  $\text{CDCl}_3$ .

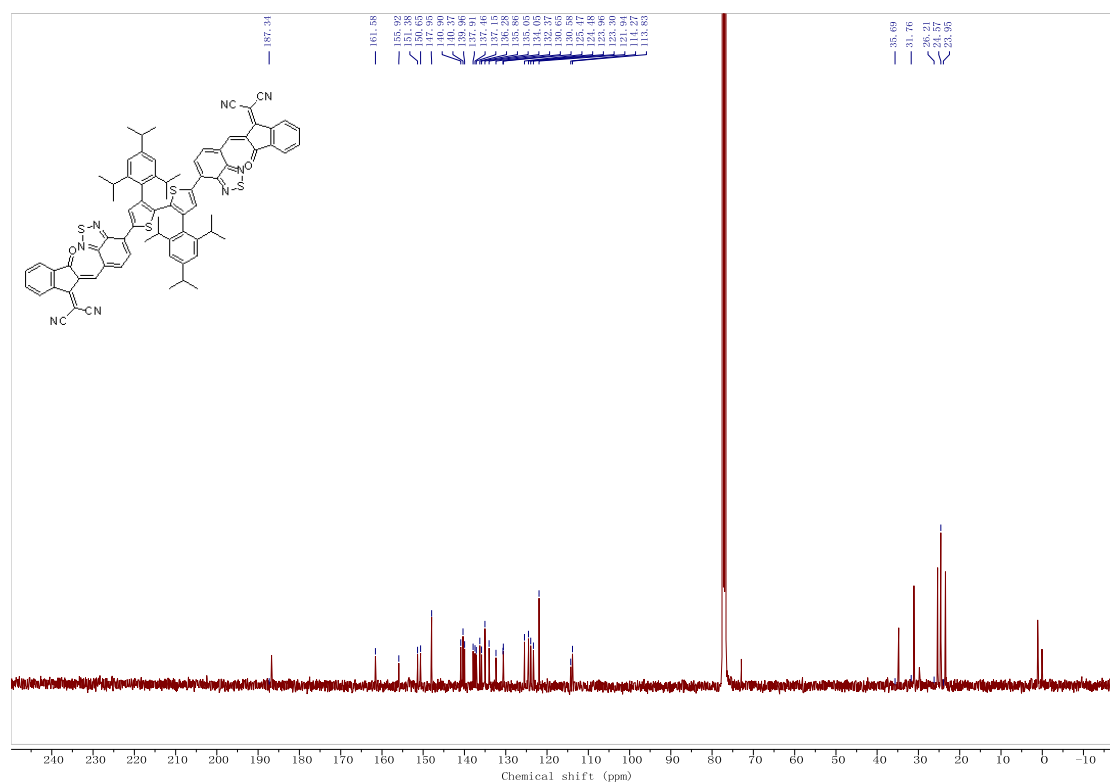

**Fig.S7**  $^{13}\text{C}$  NMR of compound **iPrBT-NFA** in CDCl<sub>3</sub>.

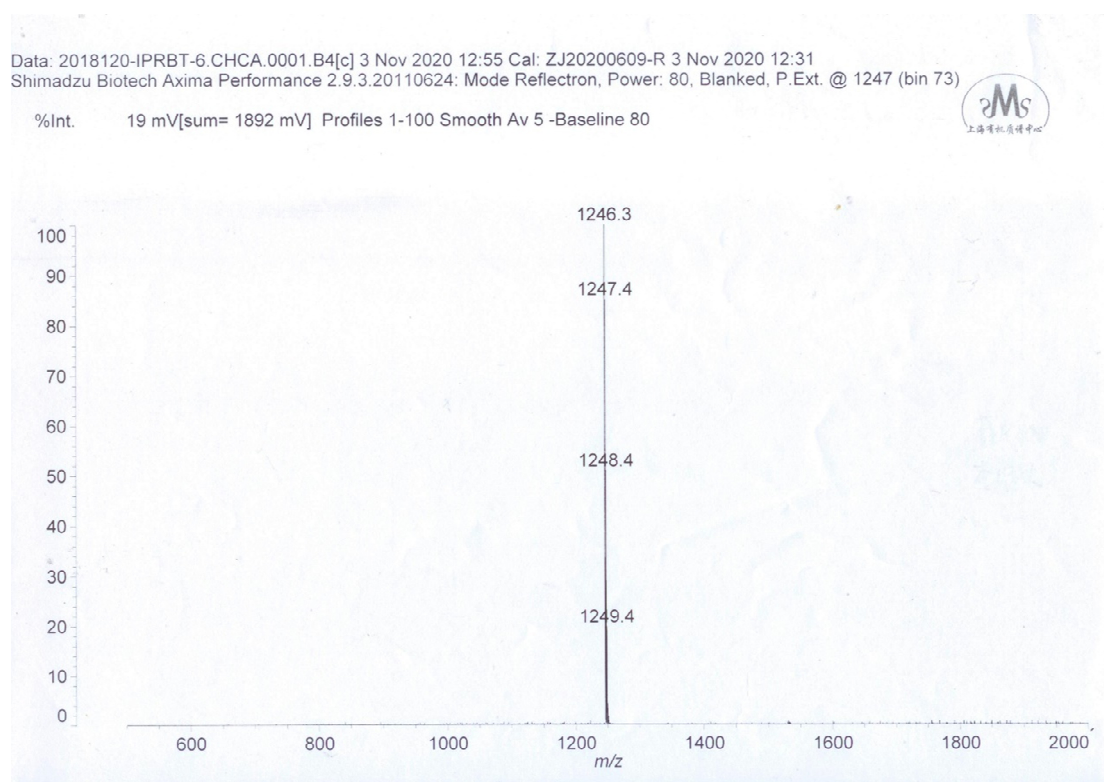

**Fig.S8** MALDI-TOF-MS spectrum of compound **iPrBT-NFA**.

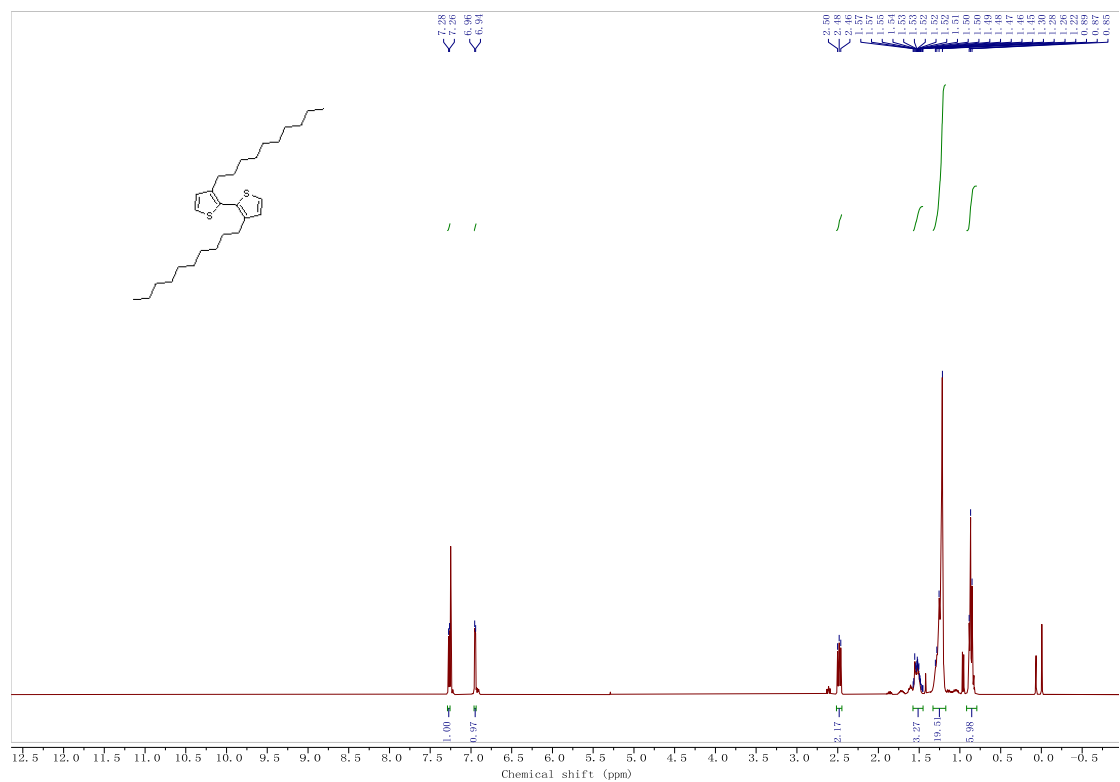

**Fig.S9**  $^1\text{H}$  NMR of compound **4** in  $\text{CDCl}_3$ .

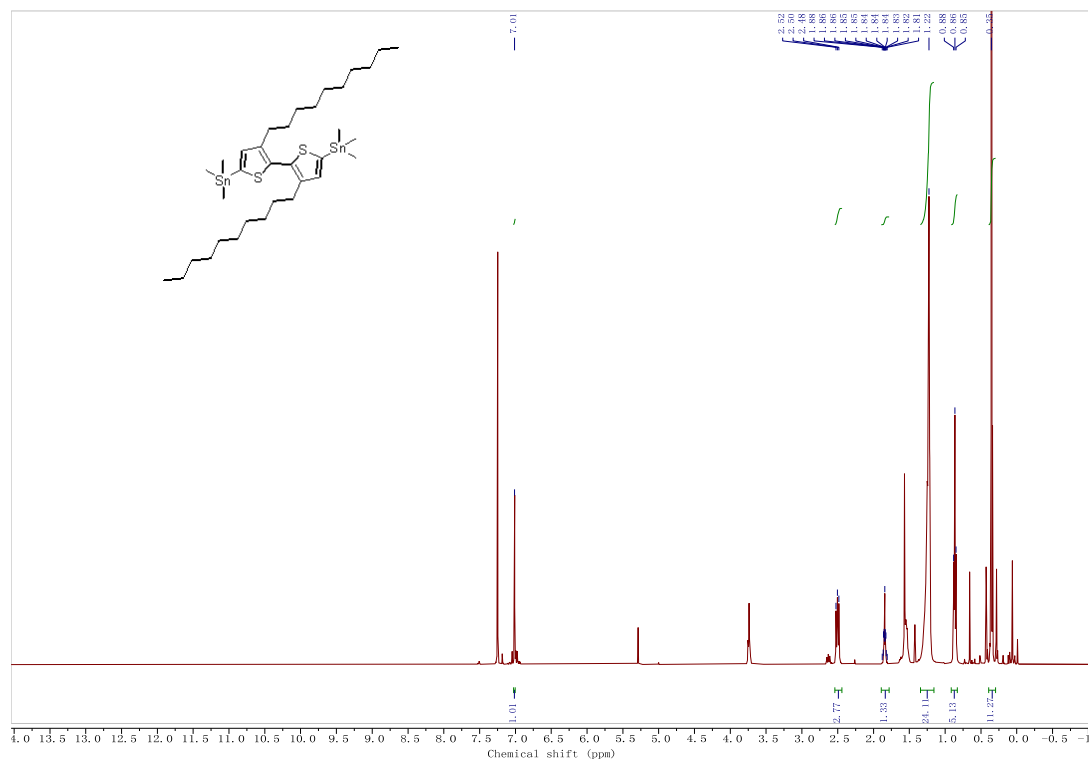

**Fig.S10**  $^1\text{H}$  NMR of compound **7** in  $\text{CDCl}_3$ .

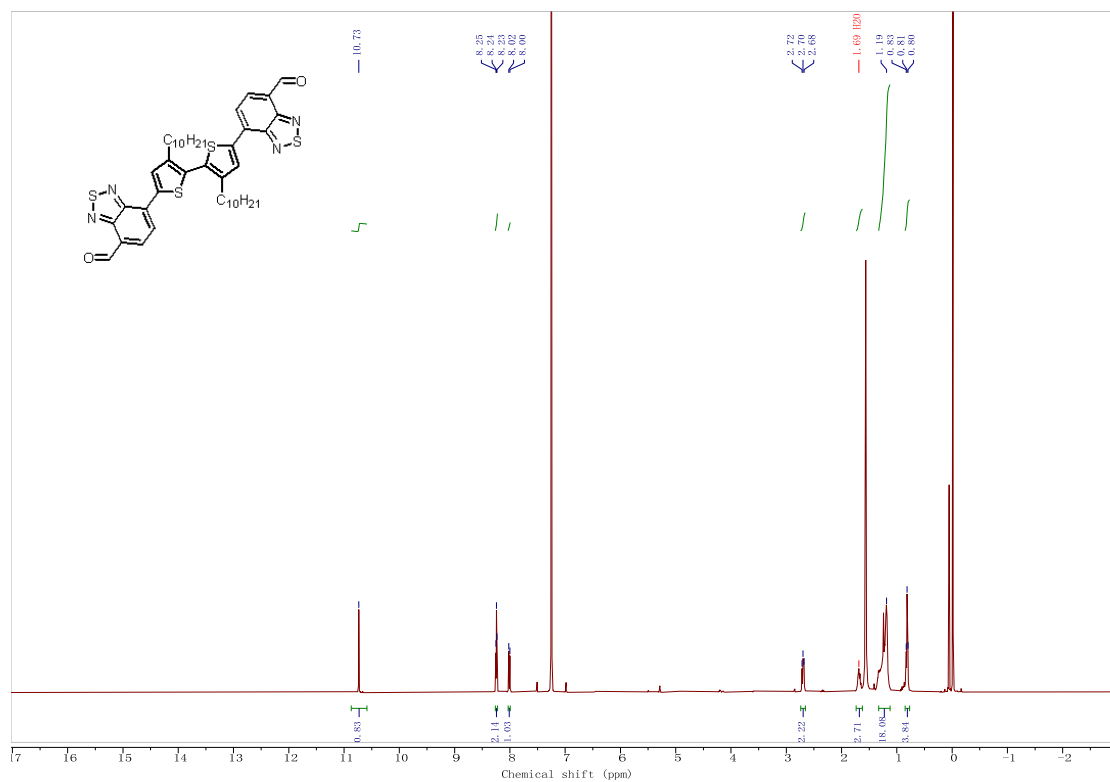

**Fig.S11**  $^1\text{H}$  NMR of compound **8** in CDCl<sub>3</sub>.

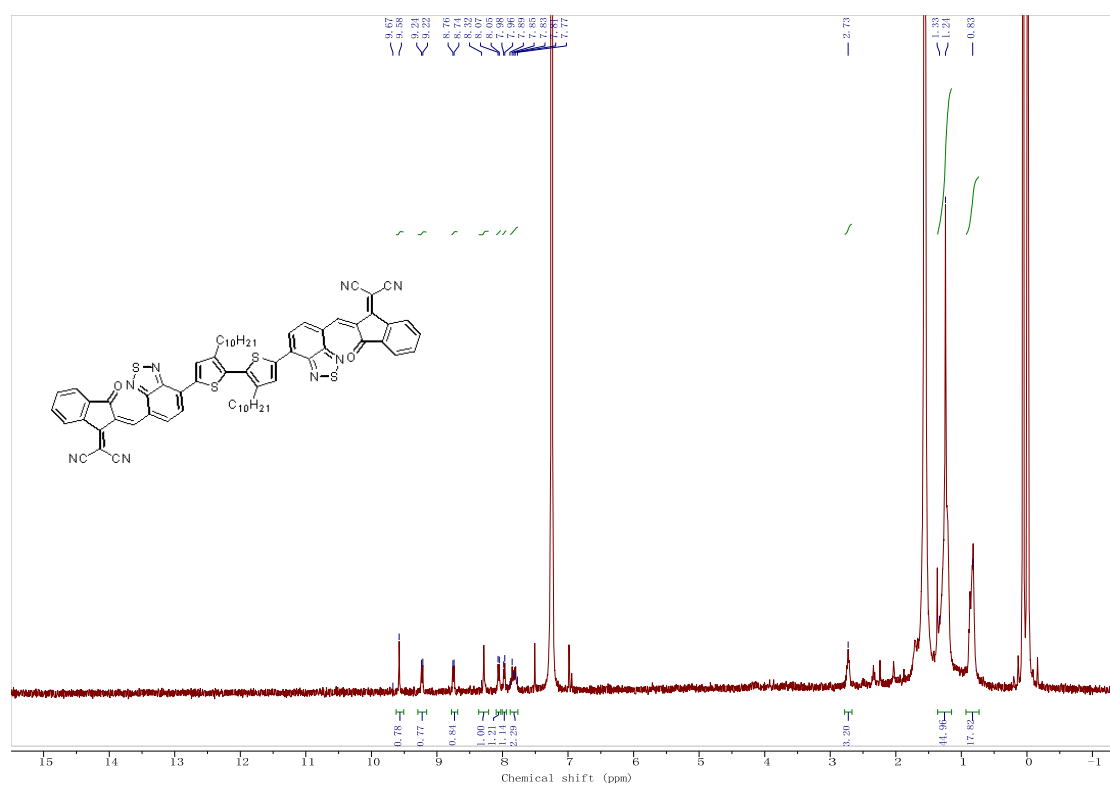

**Fig.S12**  $^1\text{H}$  NMR of compound **DeBT-NFA** in CDCl<sub>3</sub>.

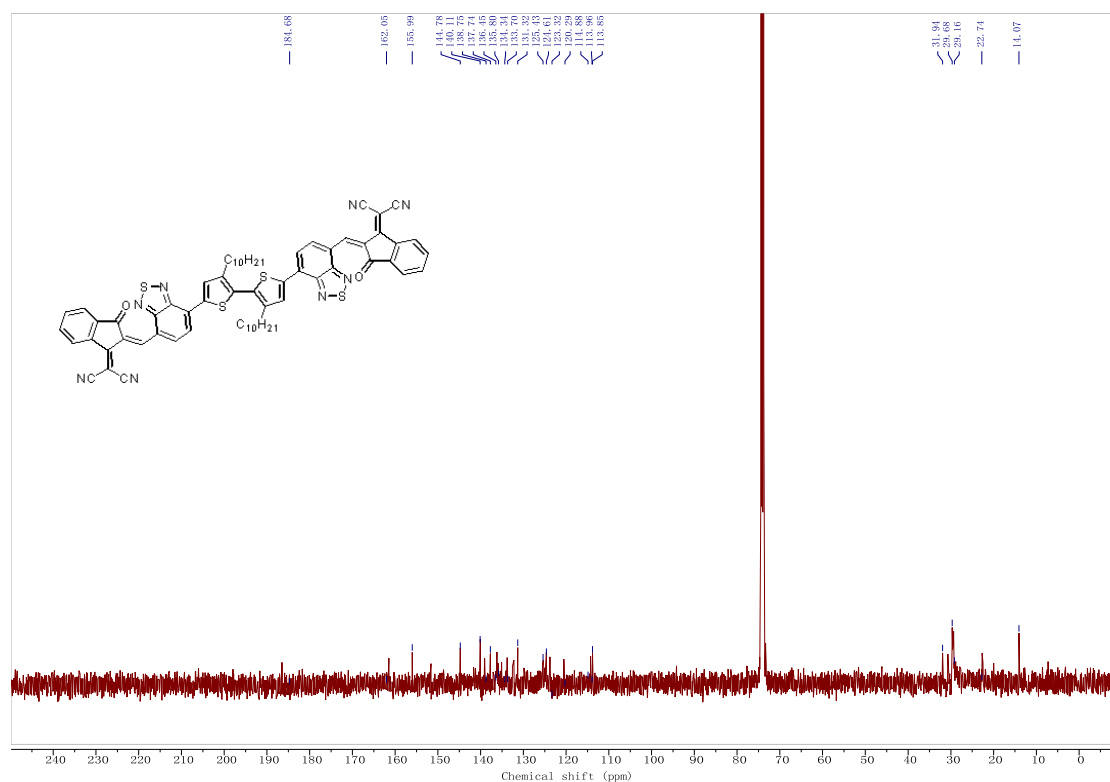

**Fig.S13** <sup>13</sup>C NMR of compound DeBT-NFA in CDCl<sub>3</sub>.

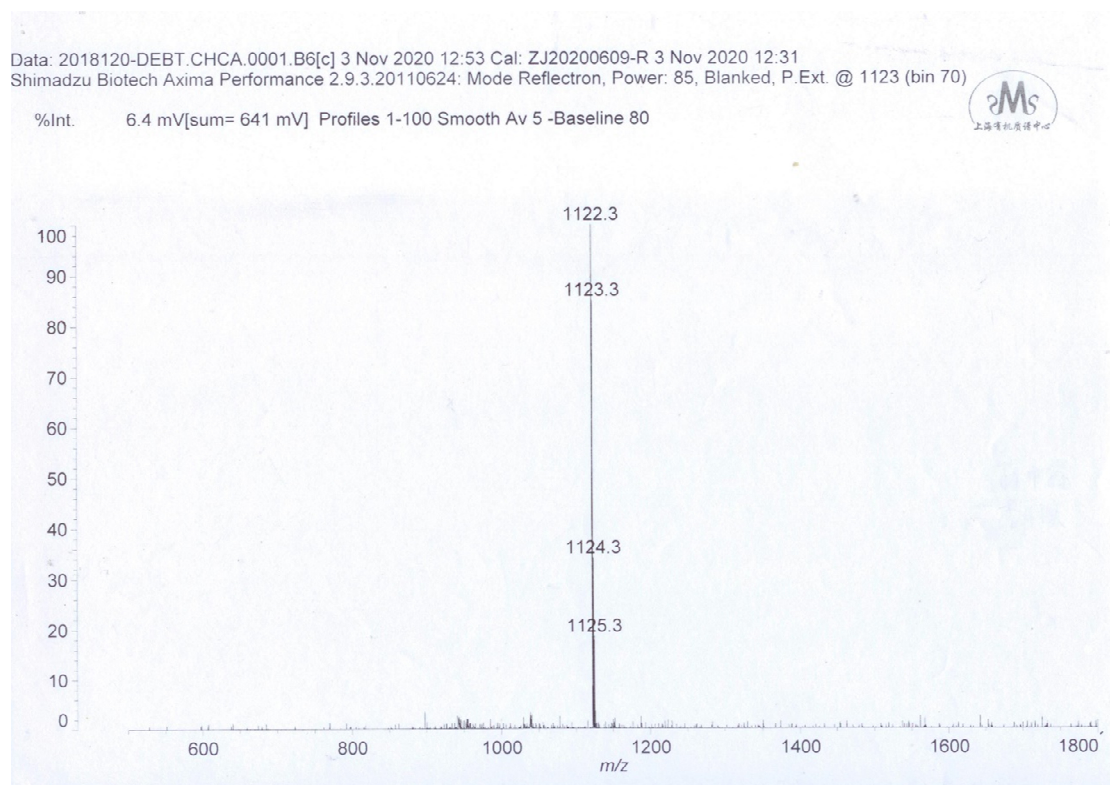

**Fig.S14** MALDI-TOF-MS spectrum of compound DeBT-NFA.

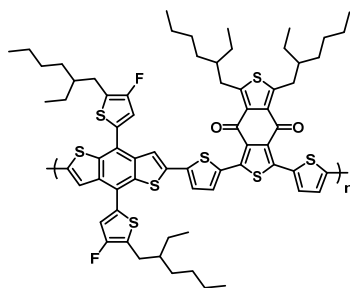

**Fig. S15** The chemical structure of **PM6**

**Table S1.** The photovoltaic performance of **iPrBT-NFA** based devices with different D:A ratios.

| D/A Ratio | $V_{OC}$ (V) | $J_{SC}$ (mA/cm <sup>2</sup> ) | Fill Factor (%) | PCE (%) |
|-----------|--------------|--------------------------------|-----------------|---------|
| 1:1       | 0.79         | 12.30                          | 44.15           | 4.29    |
| 1:1.5     | 0.76         | 12.39                          | 45.94           | 4.34    |
| 1:2       | 0.76         | 11.42                          | 45.99           | 3.95    |

(Chloroform as solvent, no additive, spin-coating speed = 3000 rpm, no annealing treatment).

**Table S2.** The photovoltaic performance of **iPrBT-NFA** based devices with different additives.

| Additive  | $V_{OC}$ (V) | $J_{SC}$ (mA/cm <sup>2</sup> ) | Fill Factor (%) | PCE (%) |
|-----------|--------------|--------------------------------|-----------------|---------|
| 0.25% DIO | 0.77         | 14.71                          | 60.34           | 6.79    |
| 0.5% DIO  | 0.75         | 15.99                          | 59.18           | 7.06    |
| 0.75% DIO | 0.73         | 16.32                          | 60.80           | 7.29    |
| 1% DIO    | 0.72         | 16.67                          | 57.52           | 6.93    |
| 0.25% CN  | 0.77         | 12.99                          | 43.96           | 4.40    |
| 0.5% CN   | 0.79         | 13.24                          | 45.77           | 4.78    |
| 1% CN     | 0.73         | 14.47                          | 52.57           | 5.57    |

(D:A ratios = 1:1.5, annealing at 100 °C for 10 min).



**Table S3.** The photovoltaic performance of **iPrBT-NFA** based devices with different solvent.

| Solvent | $V_{oc}$<br>(V) | $J_{sc}$<br>(mA/cm <sup>2</sup> ) | Fill Factor<br>(%) | PCE<br>(%) |
|---------|-----------------|-----------------------------------|--------------------|------------|
| CF      | 0.74            | 15.66                             | 57.88              | 6.73       |
| CB      | 0.73            | 4.96                              | 55.69              | 1.98       |
| Toluene | 0.72            | 5.03                              | 49.03              | 1.64       |

(D:A ratios =1:1.5, 0.75% DIO as additive, annealing at 100 °C for 10 min).

**Table S4.** The photovoltaic performance of **iPrBT-NFA** based devices with different spin-coating rotationl speed.

| rpm  | $V_{oc}$<br>(V) | $J_{sc}$<br>(mA/cm <sup>2</sup> ) | Fill Factor<br>(%) | PCE<br>(%) |
|------|-----------------|-----------------------------------|--------------------|------------|
| 3100 | 0.72            | 15.61                             | 60.55              | 6.85       |
| 3400 | 0.73            | 15.30                             | 60.56              | 6.80       |
| 3700 | 0.73            | 16.32                             | 60.80              | 7.29       |
| 4000 | 0.73            | 15.70                             | 61.66              | 7.08       |
| 4300 | 0.74            | 14.59                             | 63.09              | 6.80       |
| 4600 | 0.74            | 14.33                             | 62.28              | 6.59       |
| 4900 | 0.74            | 14.09                             | 63.83              | 6.63       |

(D:A ratios =1:1.5, 0.75% DIO as additive, annealing at 100 °C for 10 min).

**Table S5.** The photovoltaic performance of **iPrBT-NFA** based devices with different annealing conditions.

| Temperature (°C) | Time (min) | $V_{oc}$ (V) | $J_{sc}$ (mA/cm <sup>2</sup> ) | Fill Factor (%) | PCE (%) |
|------------------|------------|--------------|--------------------------------|-----------------|---------|
| 80               | 5          | 0.74         | 16.12                          | 59.68           | 7.09    |
|                  | 10         | 0.74         | 15.98                          | 61.46           | 7.31    |
|                  | 15         | 0.75         | 15.75                          | 62.24           | 7.32    |
| 100              | 5          | 0.74         | 16.30                          | 61.41           | 7.42    |
|                  | 10         | 0.74         | 15.76                          | 60.97           | 7.13    |
|                  | 15         | 0.73         | 15.42                          | 62.48           | 7.08    |
| 120              | 5          | 0.74         | 15.58                          | 62.06           | 7.15    |
|                  | 10         | 0.74         | 15.73                          | 61.95           | 7.20    |
|                  | 15         | 0.73         | 16.12                          | 58.78           | 6.95    |

(D:A ratios =1:1.5, 0.75% DIO as additive, spin-coating speed = 3700 rpm,).

**Table S6.** The photovoltaic performance of **iPrBT-NFA** based devices with different D:A ratios.

| D/A Ratio | $V_{oc}$ (V) | $J_{sc}$ (mA/cm <sup>2</sup> ) | Fill Factor (%) | PCE (%) |
|-----------|--------------|--------------------------------|-----------------|---------|
| 1:1.2     | 0.74         | 15.44                          | 62.89           | 7.16    |
| 1:1.4     | 0.73         | 16.24                          | 61.46           | 7.30    |
| 1:1.6     | 0.74         | 16.32                          | 62.92           | 7.57    |
| 1:1.8     | 0.74         | 16.31                          | 59.78           | 7.24    |

(D:A ratios =1:1.5, 0.75% DIO as additive, spin-coating speed = 3700 rpm, annealing at 100 °C for 5 min).
